1 ***Butyribacter intestini* gen. nov., sp. nov., a butyric acid-producing**  
2 **bacterium of the family *Lachnospiraceae* isolated from the**  
3 **human faeces, and reclassification of *Acetivibrio ethanolgignens***  
4 **as *Acetanaerobacter ethanolgignens* gen. nov., comb. nov.**

5

6 Wenbin Xue<sup>1</sup>, Xiaoqian Lin<sup>1,2</sup>, Mei Lv<sup>1</sup>, Guangwen Luo<sup>1</sup>, Ying Dai<sup>1</sup>, Haipeng Sun<sup>1</sup>, Liang Xiao<sup>1,</sup>  
7 <sup>3,4\*</sup>, Yuanqiang Zou<sup>1,2,3,4\*</sup>

8

9 <sup>1</sup> BGI-Shenzhen, Shenzhen 518083, China

10 <sup>2</sup> School of Bioscience and Biotechnology, South China University of Technology, Guangzhou  
11 510006, China

12 <sup>3</sup> Shenzhen Engineering Laboratory of Detection and Intervention of human intestinal microbiome,  
13 BGI-Shenzhen, Shenzhen, China

14 <sup>4</sup> Qingdao-Europe Advanced Institute for Life Sciences, BGI-Shenzhen, Qingdao 266555, China

15 <sup>5</sup> Department of Biology, University of Copenhagen, Ole Maaløes Vej 5, 2200 Copenhagen,  
16 Denmark

17

18 **\*Corresponding authors:**

19 Liang Xiao.

20 Address: BGI-Shenzhen, Beishan Industrial Zone, Shenzhen 518083, China.

21 E-mail: [xiaoliang@genomics.cn](mailto:xiaoliang@genomics.cn)

22 Yuanqiang Zou.

23 Address: BGI-Shenzhen, Beishan Industrial Zone, Shenzhen 518083, China.

24 E-mail: [zouyuanqiang@genomics.cn](mailto:zouyuanqiang@genomics.cn)

25

26

27 **Short title:** *Butyribacter intestini* gen. nov., sp. nov.

28 **Contents category:** New taxa - *Firmicutes* and related organisms

29

30 **Footnote:**

31 The GenBank/EMBL/DDBJ accession number for the 16S rRNA gene sequence of *Butyribacter*  
32 *intestini* TF01-11<sup>T</sup> is KT388745. The GenBank/EMBL/DDBJ accession numbers for the genome  
33 sequences of TF01-11<sup>T</sup> and *Acetivibrio ethanolgignens* ATCC 33324<sup>T</sup> are LLKB00000000 and  
34 LNAM00000000, respectively. The data that support the findings of this study have also been  
35 deposited into CNGB Sequence Archive (CNSA: <https://db.cngb.org/cnsa/>) of CNGBdb with  
36 accession number CNPhis0003380 and CNPhis0003389.

37

38

39

40

41 **Abstract**

42 A novel, non-motile, Gram-stain-positive, non-spore-forming, obligate anaerobic  
43 bacterium, designated strain TF01-11<sup>T</sup>, was isolated from human faeces. The isolate was  
44 characterized by phylogenetic and phenotypic properties, as well as by determination of its  
45 whole genome sequence. The growth temperature and pH ranges were 30–42 °C and 6.0–8.5,  
46 respectively. The end products of glucose fermentation were butyric acid and a small  
47 amount of acetic acid. The genome was estimated to be 3.61Mbp with G+C content of 36.79  
48 mol%. Genes related to biosynthesis of diaminopimelic acid, polar lipids, polyamines,  
49 teichoic and lipoteichoic acids were present. The predominant fatty acids were C<sub>16:0</sub> (37.9 %),  
50 C<sub>14:0</sub> (16.4 %), C<sub>13:0</sub> OH/iso-C<sub>15:1</sub> H (11.1 %) and C<sub>18:1</sub> ω<sub>9c</sub> (10.6 %). Phylogenetic analyses  
51 based on 16S rRNA gene sequences, the isolate was a member of family *Lachnospiraceae*,  
52 with the highest sequence similarity to the type strain of *Roseburia intestinalis* DSM 14610<sup>T</sup>  
53 at 92.18 % followed by *Acetivibrio ethanolgignens* ATCC 33324<sup>T</sup> at 91.99 %. The average  
54 nucleotide identity (ANI) calculated for the genomes between strain TF01-11<sup>T</sup> and these  
55 closest relatives were 70.5 % and 68.1 %. Based on results of phenotypic characteristics and  
56 genotypic properties presented in this study, strain TF01-11<sup>T</sup> represent a novel species in a  
57 new genus, for which the name *Butyribacter intestini* gen. nov., sp. nov. is proposed. The type  
58 strain of the type species is TF01-11<sup>T</sup> (CGMCC 1.5203<sup>T</sup> = CGMCC 10984<sup>T</sup> = DSM 105140<sup>T</sup>).  
59 In addition, *Acetivibrio ethanolgignens* is proposed to be reclassified as *Acetanaerobacter*  
60 *ethanolgignens* gen. nov., comb. nov.

61

62

63

64

65

## 66 **Introduction**

67 The human intestine is colonized by a large number of microbial communities, which is 10  
68 times higher than the total cells in the human body [1]. In total there are more than 4000 different  
69 species in the gut (Almeida *et al.*, 2020). Most of the intestinal microbiota species are obligate  
70 anaerobes [2]. These gut microbiota play a key role involving nutrition extraction [3], host  
71 metabolic [4-6], prevention against pathogens [7] and immune regulation [8, 9]. Current evidence  
72 also suggests that the gut microbiota can be considered an environmental factor in development of  
73 disease, including obesity [10, 11], diabetes [11-13], inflammatory bowel disease [14, 15] and  
74 colorectal cancer [16-18]. Member of the family *Lachnospiraceae* was one of the most abundant  
75 groups within the *Firmicutes* [19, 20]. The production of butyric acid, a short-chain fatty acid,  
76 links with *Lachnospiraceae* has potentially beneficial effects on the host [21-23]. Butyrate is  
77 considered as one beneficial metabolites, which serves as the major energy source of intestinal  
78 epithelial cells and has anti-inflammatory properties [24, 25].

79 In this study, we report on the taxonomic characterization of a new butyrate-producing bacterial  
80 strain, TF01-11<sup>T</sup>, which was isolated from the faeces of a 17-year-old Chinese female. On the  
81 basis of the phenotypic, chemotaxonomic, genotypic and phylogenetic data, strain TF01-11<sup>T</sup>  
82 represents a novel genus in the family *Lachnospiraceae*, with the proposed name, *Butyribacter*  
83 *intestini* gen. nov., sp. nov. Furthermore, we suggest reclassification of *Acetivibrio ethanolgignens*  
84 to *Acetanaerobacter ethanolgignens* gen. nov., comb. nov.

85

## 86 **Material and methods**

87 *Sample collection and bacteria isolation*

88 The fresh faeces sample was transferred immediately to anaerobic box (Bactron Anaerobic  
89 Chamber, Bactron<sup>®</sup>-2, shellab, USA) and suspended in 0.1 M PBS (pH 7.0) after collected from a  
90 a 17-year-old Chinese female living in Shenzhen. The faeces sample was tenfold diluted and  
91 spread-plated onto peptone-yeast extract-glucose (PYG) plates and incubated under anaerobic  
92 condition (contained 90 % nitrogen, 5 % hydrogen and 5 % carbon dioxide, by vol.) at 37 °C for 3  
93 days. Single colonies were picked and streaked onto PYG agar until a pure culture was obtained  
94 according the method previously [26]. The strain was maintained in glycerol suspension (20 %,  
95 v/v) at -80 °C and preserved by lyophilization at 4 °C.

#### 96 *Phenotypical characterization*

97 Cellular morphology of strain TF01-11<sup>T</sup> was examined using phase contrast microscopy  
98 (Olympus BX51, Japan) by using cells grown in prereduced anaerobically sterilized PYG broth at  
99 37 °C for 24 h. The Gram reaction and spore formation were performed by staining using Gram  
100 stain kit (Solarbio) and spore stain kit (Solarbio) according to the manufacturer's instructions.  
101 Motility of cells grown in PYG broth was examined by phase-contrast microscopy. All growth  
102 experiments, described below, were evaluated using the PYG medium in two replicates (1 %, v/v,  
103 inoculum) and recorded by measuring the OD<sub>600</sub> of the cultures after 24, 48 h and 7 d,  
104 respectively. The temperature range for growth at 4, 10, 15, 20, 25, 30, 37, 42, 45 and 50 °C and  
105 the pH range for growth was assessed at pH 3.0–10.0 (at interval of 0.5 pH units). Salt tolerance  
106 was determined in PYG broth containing 0–6.0 % (w/v) NaCl (at 1.0 % intervals). Biochemical  
107 reactions and carbon source utilization were investigated by using the API ZYM, API 20A and  
108 API 50CH tests (bioMe'rieux) according to the manufacturer's instructions. Short-chain fatty  
109 acids (SCFA) produced from fermentation in PYG medium was measured by gas chromatograph  
110 (GC-2014C, Shimadzu) using capillary columns packed with porapak HP-INNOWax (Cross-  
111 Linked PEG, 30 m × 0.25 mm × 0.25 um) and detected with a flame-ionization detector. Column  
112 temperature was 220 °C, N<sub>2</sub> was used as the carrier gas in all analyses.

#### 113 *Chemotaxonomic analyses*

114 Cells grown for 48 h at 37 °C on PYG agar plates were used for the whole-cell fatty acid and  
115 peptidoglycan analyses. Cellular fatty acids (CFA) of strain TF01-11<sup>T</sup> and related species were  
116 extracted, methylated and analysed by GC as described previously (Chen & Dong, 2004). The  
117 analysed of peptidoglycan structure was carried as described previously [27].

#### 118 *Phylogenetic analysis based on 16S rRNA gene*

119 The genomic DNA was extracted from cells grown in PYG broth for 24 h at 37°C and purified  
120 using the method described by Drancourt *et al.* [28]. The 16S rRNA gene sequence was amplified  
121 by PCR and sequenced as described previously [27]. The sequence obtained was compared with  
122 entries in EzBioCloud server [29]. Phylogenetic analysis was performed by using software  
123 package MEGA 7 [30]. Sequences of TF01-11<sup>T</sup> and related type species were aligned and used to  
124 construe a phylogenetic tree by the neighbour-joining method [31] and maximum likelihood  
125 method using CLUSTAL W [32]. In each case, bootstrap values were calculated based on 1000  
126 replications.

#### 127 *Whole Genome analysis*

128 The draft whole-genome sequence of strain TF01-11<sup>T</sup> was performed by using a paired-end  
129 strategy with the platform Illumina HiSeq 2000 at BGI-Shenzhen (Shenzhen, China). The paired-  
130 end library had an mean insert length of 500 bp. Paired-end de novo genome assembly was  
131 performed with SOAPdenovo 2 package [33]. The genome sequence of strain TF01-11<sup>T</sup> was  
132 compared with available genome sequences of representatives of the family *Lachnospiraceae*. All  
133 genome sequences were obtained from the GenBank sequence database. Individual coding  
134 sequences were annotated using the Rapid Annotation Subsystem Technology (RAST) server [34],  
135 freely available at (<http://rast.nmpdr.org>). DNA base content (mol% G+C) was calculated from the  
136 whole genome sequence. The average nucleotide identity (ANI) values were calculated for strain  
137 TF01-11<sup>T</sup> and the most closely related species *R. intestinalis* DSM 14610<sup>T</sup>, *A. ethanolgignens*  
138 ATCC 33324<sup>T</sup>, *Lachnospira multipara* DSM 3073<sup>T</sup> and *Coprococcus eutactus* ATCC 27759<sup>T</sup>.

139

## 140 **Results and discussion**

### 141 *16S rRNA gene sequencing and phylogenetic analyses*

142 The almost complete 16S rRNA gene sequence of strain TF01-11<sup>T</sup> of 1,400 bp was determined.  
143 Comparative sequence analysis of strain TF01-11<sup>T</sup> and validly published names using the  
144 EzBioCloud server revealed that the most similar sequences were those of the members of family  
145 *Lachnospiraceae* of the phylum *Firmicutes*. The 16S rRNA gene sequence similarity of strain  
146 TF01-11<sup>T</sup> and the closest relatives, *Roseburia intestinalis* DSM 14610<sup>T</sup> [35] and *Acetivibrio*  
147 *ethanolgignens* ATCC 33324<sup>T</sup> [36], were 92.18 % and 91.99 % (Table 3), respectively, which was  
148 below the ‘lower cut-off window’ of 95 % for differentiation of a new genus [37, 38]. Furthermore,  
149 the phylogenetic analysis showed that strain TF01-11<sup>T</sup>, together with the closest relative *A.*  
150 *ethanolgignens* ATCC 33324<sup>T</sup>, formed a separate branch within the family *Lachnospiraceae* (Fig.  
151 1 and Supplementary Fig. S1). Additionally, the type species of the genus *Acetivibrio*, *Acetivibrio*  
152 *cellulolyticus*, is phylogenetically classified in the family *Ruminococcaceae* according to the  
153 taxonomy list in LPSN (<https://lpsn.dsmz.de/genus/acetivibrio>) and shared a low 16S rRNA gene  
154 sequence similarity (85.2 %) with *A. ethanolgignens* ATCC 33324<sup>T</sup>. It is obvious that strain *A.*  
155 *ethanolgignens* ATCC 33324<sup>T</sup> does not cluster together with *Acetivibrio cellulolyticus* in the  
156 family *Ruminococcaceae*, but more closely group in the family *Lachnospiraceae*. This result was  
157 also confirmed by the maximum-likelihood method (Supplementary Fig. S1), suggesting that *A.*  
158 *ethanolgignens* ATCC 33324<sup>T</sup> should be reclassified as a new genus of the family  
159 *Lachnospiraceae*.

### 160 *Whole genome sequencing and G+C content*

161 Sequencing of the genome produced an annotated genome size of approximately 3.61 Mbp. The  
162 G+C content of DNA was 36.79 mol% as calculated from the whole-genome sequence (Table 2).  
163 The ANI between strain TF01-11<sup>T</sup> and *R. intestinalis* DSM 14610<sup>T</sup>, *A. ethanolgignens* ATCC  
164 33324<sup>T</sup>, *L. multipara* DSM 3073<sup>T</sup> and *C. eutactus* ATCC 27759<sup>T</sup> had a maximum value of 70.5 %  
165 (Table 3).

166 For RAST annotation with genome of strain TF01-11<sup>T</sup>, there were 11 genes associated with  
167 diaminopimelic acid synthesis, 7 genes associated with metabolism of polyamines, 12 genes  
168 associated with teichoic and lipoteichoic acids and 20 genes associated with metabolism of polar  
169 lipids, respectively, present in the genome (Table 4 and Table S2). No predicted gene sequences  
170 with recognizable similarity to those responsible for respiratory lipoquinones, mycolic acids or  
171 lipopolysaccharides.

#### 172 *Phenotypic and chemotaxonomic characteristics*

173 Strain TF01-11<sup>T</sup> was non-motile, Gram-stain-positive and non-spore-forming. No growth  
174 occurred under aerobic conditions. Cells were approximately 0.5–1.0 µm in width and 2.0–8.0 µm  
175 in length and occurring singly or in chains. Colonies on PYG agar plates were approximately 2.0  
176 mm in diameter, grayish white, opaque, flat, smooth, dull and irregular with rhizoid margins after  
177 48 h incubation at 37 °C under anaerobic conditions. The temperature for growth range from  
178 30 °C to 42 °C (optimum 37 °C). The pH growth range was pH 6.0–8.5 (optimum pH 7.0). The  
179 NaCl tolerance range was 0 %–2.0 % (w/v). The major SCFAs produced in PYG broth were  
180 butyric and acetic acids. The main physiological and biochemical properties of strain TF01-11<sup>T</sup>  
181 are given in Table 1 in comparison with closely related genera within family *Lachnospiraceae*.  
182 The predominant cellular fatty acid (>10 %) of strain TF01-11<sup>T</sup> were C<sub>16:0</sub> (37.9 %), C<sub>14:0</sub> (16.4 %),  
183 C<sub>13:0</sub> OH/iso-C<sub>15:1</sub> H (11.1 %) and C<sub>18:1</sub> ω9c (10.6 %) (Table S1, available in the online  
184 Supplementary Material), The whole-cell hydrolysate of strain TF01-11<sup>T</sup> contained meso-  
185 diaminopimelic acid (m-DAP).

#### 186 *Taxonomic conclusions*

187 Base on genomic, phylogeny, phenotypic and chemotaxonomic characteristics of strain TF01-  
188 11<sup>T</sup> presented above, we propose that this strain isolated from the faeces represents a novel species  
189 of a new genus distinct from other currently known species of family *Lachnospiraceae*, for which  
190 the name *Butyribacter intestini* gen. nov., sp. nov. is proposed. In addition, we propose  
191 reclassifying *Acetivibrio ethanolgignens* ATCC 33324<sup>T</sup> within a new genus in the family  
192 *Lachnospiraceae*, *Acetanaerobacter ethanolgignens* gen. nov., comb. nov.



193

194 **Description of *Butyribacter* gen. nov.**

195 *Butyribacter* (Bu.ty.ri.bac'ter. N.L. n. *acidum butyricum* butyric acid; N.L. masc. n. *bacter* a rod;  
196 N.L. masc. n. *Butyribacter* a butyric acid-producing rod).

197 Gram-stain-negative, non-motile, non-spore-forming rods, about 2.0–8.0 µm long and 0.5–1.0 µm  
198 wide, occurring singly or in chains. Obligately anaerobic. Optimum growth temperature is  
199 approximately 37 °C. Butyric and acetic acids are the major metabolic end products in PYG broth.  
200 Meso-diaminopimelic acid is present in the hydrolysate of the peptidoglycan. The main fatty acids  
201 are C<sub>16:0</sub>, C<sub>14:0</sub>, C<sub>13:0</sub> OH/iso-C<sub>15:1</sub> H and C<sub>18:1</sub> ω<sub>9</sub>c. The genome size is circa 3.6 Mbp. The genus is  
202 affiliated to the family *Lachnospiraceae*. The type species is *Butyribacter intestini*.

203

204 **Description of *Butyribacter intestini* sp. nov.**

205 *Butyribacter intestini* (in.tes'ti.ni. L. gen. n. *intestini* of the gut, referring to the ecosystem of origin  
206 of the bacterium).

207 Cell morphology is the same as described for the genus. Colonies are approximately 2.0 mm in  
208 diameter, grayish white, opaque, flat, smooth, dull and irregular with rhizoid margins after 48 h at  
209 37 °C. Growth occurs between 30 and 42 °C (optimum 37 °C) and at pH 6.0–8.5 (optimum pH  
210 7.0–7.5). Positive result in tests for acid phosphatase (weak reaction) and α-glucosidase activities,  
211 but negative for alkaline phosphatase, esterase (C4), esterase lipase (C8), lipase (C14), leucine  
212 arylamidase, valine arylamidase, cystine arylamidase, trypsin, α-chymotrypsin, naphthol-AS-BI-  
213 phosphohydrolase, α-galactosidase, β-galactosidase, β-glucuronidase, β-glucosidase, N-acetyl-β-  
214 glucosaminidase, α-mannosidase and β-fucosidase. Acid is produced from glucose, ribose (weak  
215 positive), galactose, fructose, methyl-D-glucopyranoside, cellobiose, maltose, melibiose, sucrose,  
216 starch, turanose, but not from xylose, adonitol, salicin, methyl-β-D-xylopyranoside, arabinose,  
217 glycerol, sorbose, dulcitol, melezitose, inositol, raffinose, mannitol, sorbitol, rhamnose, methyl-α-

218 D-mannopyranoside, *N*-acetyl-glucosamine, amygdalin, arbutin, trehalose, inulin, glycogen,  
219 xylitol, gentiobiose, lyxose, tagatose, fucose, arabitol, gluconate, 2-ketogluconate and 5-  
220 ketogluconate. Indole is not produced. Gelatin is liquefied. Aesculin is not hydrolysed. There  
221 were 11 genes/proteins responsible for biosynthesis of DAP, including 4-hydroxy-  
222 tetrahydrodipicolinate reductase (EC 1.17.1.8) (1 gene), 4-hydroxy-tetrahydrodipicolinate  
223 synthase (EC 4.3.3.7) (1 gene), aspartate-semialdehyde dehydrogenase (EC 1.2.1.11) (1 gene),  
224 aspartokinase (EC 2.7.2.4) (1 gene), diaminopimelate decarboxylase (EC 4.1.1.20) (1 gene),  
225 diaminopimelate epimerase (EC 5.1.1.7) (1 gene), L,L-diaminopimelate aminotransferase (EC  
226 2.6.1.83) (1 gene), *N*-acetyl-L, L-diaminopimelate deacetylase (EC 3.5.1.47) (2 genes), UDP-*N*-  
227 acetylmuramoylalanyl-D-glutamate--2,6-diaminopimelate ligase (EC 6.3.2.13) (1 gene), and UDP-  
228 *N*-acetylmuramoylalanyl-D-glutamyl-2,6-diaminopimelate--D-alanyl-D-alanine ligase (EC 6.3.2.10)  
229 (1 gene), 7 genes/proteins responsible for biosynthesis of polyamines, including 5'-  
230 methylthioadenosine nucleosidase (EC 3.2.2.16) @ *S*-adenosylhomocysteine nucleosidase (EC  
231 3.2.2.9) (1 gene), ABC transporter, periplasmic spermidine putrescine-binding protein PotD (TC  
232 3.A.1.11.1) (1 gene), arginine decarboxylase (EC 4.1.1.19) / lysine decarboxylase (EC 4.1.1.18) (1  
233 gene), carbamate kinase (EC 2.7.2.2) (1 gene), putrescine transport ATP-binding protein PotA  
234 (TC 3.A.1.11.1) (1 gene), spermidine Putrescine ABC transporter permease component PotB (TC  
235 3.A.1.11.1) (1 gene), and spermidine putrescine ABC transporter permease component potC  
236 (TC..3.A.1.11.1) (1 gene), 12 genes/protein responsible for biosynthesis of teichoic and  
237 lipoteichoic acids, including 2-*C*-methyl-D-erythritol 4-phosphate cytidyltransferase (EC  
238 2.7.7.60) (2 genes), CDP-glycerol:poly(glycerophosphate) glycerophosphotransferase (EC  
239 2.7.8.12) (2 genes), membrane protein involved in the export of O-antigen, teichoic acid  
240 lipoteichoic acids (1 gene), minor teichoic acid biosynthesis protein GgaB (1 gene), *N*-  
241 acetylmannosaminyltransferase (EC 2.4.1.187) (1 gene), teichoic acid export ATP-binding protein  
242 TagH (EC 3.6.3.40) (3 genes), teichoic acid glycosylation protein (1 gene), and teichoic acid  
243 translocation permease protein TagG (1 gene), and 20 genes/protein responsible for biosynthesis  
244 of polar lipids, including 1-acyl-sn-glycerol-3-phosphate acyltransferase (EC 2.3.1.51) (2 genes),  
245 acyl carrier protein (2 genes), acyl-phosphate:glycerol-3-phosphate O-acyltransferase PlsY (1  
246 gene), alcohol dehydrogenase (EC 1.1.1.1) (1 gene), acetaldehyde dehydrogenase (EC 1.2.1.10) (1

247 gene), aldehyde dehydrogenase (EC 1.2.1.3) (1 gene), cardiolipin synthetase (EC 2.7.8.-) (1 gene),  
248 CDP-diacylglycerol--glycerol-3-phosphate 3-phosphatidyltransferase (EC 2.7.8.5) (1 gene), CDP-  
249 diacylglycerol--serine O-phosphatidyltransferase (EC 2.7.8.8) (1 gene), dihydroxyacetone kinase  
250 family protein (1 gene), glycerate kinase (EC 2.7.1.31) (1 gene), glycerol-3-phosphate  
251 dehydrogenase (EC 1.1.5.3) (1 gene), glycerol-3-phosphate dehydrogenase [NAD(P)<sup>+</sup>] (EC  
252 1.1.1.94) (1 gene), phosphate:acyl-ACP acyltransferase PlsX (1 gene), phosphatidate  
253 cytidylyltransferase (EC 2.7.7.41) (1 gene), phosphatidylglycerophosphatase B (EC 3.1.3.27) (1  
254 gene), and phosphatidylserine decarboxylase (EC 4.1.1.65) (1 gene). There are no genes  
255 responsible for biosynthesis of respiratory lipoquinones, mycolic acids or lipopolysaccharides.

256 The type strain is TF01-11<sup>T</sup> (CGMCC 1.5203<sup>T</sup> = CGMCC 10984<sup>T</sup> = DSM 105140<sup>T</sup>), isolated from  
257 the faeces obtained from a 17-year-old Chinese female. The DNA G+C content of the type strain  
258 is 36.79 mol%.

259

#### 260 **Description of *Acetanaerobacter* gen. nov.**

261 *Acetanaerobacter* (A.cet.an.ae.ro. bac'ter. L. n. *acetum* vinegar; Gr. pref. *an* not; Gr. masc. n. *aer*  
262 air; N.L. masc. n. *bacter* a rod; N.L. masc. n. *Acetanaerobacter* vinegar-producing anaerobic rod).

263 Cells are nonsporeforming, motile, Gram-stain-negative rods, obligately anaerobic, which do not  
264 grow under microaerophilic or aerobic conditions. Growth occurs between 30 and 42 °C  
265 (optimum 37 °C) and at pH 7.0–9.0 (optimum pH 7.0). Acetic and lactate acids are the major  
266 metabolic end products in PYG broth. Major fatty acids are C<sub>14:0</sub>, C<sub>16:0</sub> and C<sub>18:1 ω9c</sub>. The  
267 genome size is circa 3.7 Mbp. The genomic DNA G+C content of the type species is 41.0 mol%.

268 The type species is *Acetanaerobacter ethanolgignens*.

269

#### 270 **Description of *Acetanaerobacter ethanolgignens* comb. nov.**

271 The description of the species is given by Robinson & Ritchie (1881) and determined from this  
272 study. Cells are about 0.5–0.9  $\mu\text{m}$  long and 1.5–2.5  $\mu\text{m}$  wide, occurring singly, in pairs, and often  
273 in short chains. Colonies are yellowish-white, circular, convex, smooth, translucent, and 0.5 to 1.5  
274 mm in diameter on PYG plate after 2–3 days of cultivation. The fermentation products is acetic  
275 acid, ethanol, hydrogen, and carbon dioxide. Positive result in tests for leucine arylamidase  
276 activity, but negative for acid phosphatase,  $\alpha$ -glucosidase activities, alkaline phosphatase, esterase  
277 (C4), esterase lipase (C8), lipase (C14), valine arylamidase, cystine arylamidase, trypsin,  $\alpha$ -  
278 chymotrypsin, naphthol-AS-BI-phosphohydrolase,  $\alpha$ -galactosidase,  $\beta$ -galactosidase,  $\beta$ -  
279 glucuronidase,  $\beta$ -glucosidase, *N*-acetyl- $\beta$ -glucosaminidase,  $\alpha$ -mannosidase and  $\beta$ -fucosidase. Acid  
280 is produced from glucose, mannose, lactose, maltose, salicin, mannose, cellobiose (weak positive),  
281 raffinose (weak positive), fructose, galactose, mannitol, pyruvate and starch (weak positive), but  
282 not from xylose, arabinose, glycerol, melezitose, sorbitol, rhamnose, trehalose, adonitol, lactate,  
283 raffinose, ribose and sucrose. Indole is not produced. Gelatin is liquefied. Aesculin is not  
284 hydrolysed.

285 The type strain is 77-6<sup>T</sup> (= ATCC 33324<sup>T</sup> = DSM 3005<sup>T</sup>)

286

## 287 **Acknowledgements**

288 This work was supported by grants from National Key Research and Development Program of  
289 China (No. 2018YFC1313800) and Natural Science Foundation of Guangdong Province, China  
290 (No. 2019B020230001). We are grateful to Professor Fang Chengxiang for his support in  
291 technical advice. We also thank the colleagues at BGI-Shenzhen for sample collection, and  
292 discussions, and China National Genebank (CNGB) Shenzhen for DNA extraction, library  
293 construction, sequencing.

294

295

296

297

298

299

## 300 **References**

301 [1] P. Bourlioux, B. Koletzko, F. Guarner, V. Braesco, The intestine and its microflora are  
302 partners for the protection of the host: report on the Danone Symposium "The Intelligent  
303 Intestine," held in Paris, June 14, 2002, *Am J Clin Nutr*, 78 (2003) 675-683.

304 [2] A. Suau, R. Bonnet, M. Sutren, J.J. Godon, G.R. Gibson, M.D. Collins, J. Dore, Direct  
305 analysis of genes encoding 16S rRNA from complex communities reveals many novel molecular  
306 species within the human gut, *Appl Environ Microbiol*, 65 (1999) 4799-4807.

307 [3] H.J. Flint, K.P. Scott, P. Louis, S.H. Duncan, The role of the gut microbiota in nutrition and  
308 health, *Nat Rev Gastroenterol Hepatol*, 9 (2012) 577-589.

309 [4] J.K. Nicholson, E. Holmes, J. Kinross, R. Burcelin, G. Gibson, W. Jia, S. Pettersson, Host-gut  
310 microbiota metabolic interactions, *Science*, 336 (2012) 1262-1267.

311 [5] B.S. Ramakrishna, Role of the gut microbiota in human nutrition and metabolism, *J*  
312 *Gastroenterol Hepatol*, 28 Suppl 4 (2013) 9-17.

313 [6] S.A. Joyce, C.G. Gahan, The gut microbiota and the metabolic health of the host, *Curr Opin*  
314 *Gastroenterol*, 30 (2014) 120-127.

315 [7] N. Kamada, G.Y. Chen, N. Inohara, G. Nunez, Control of pathogens and pathobionts by the  
316 gut microbiota, *Nat Immunol*, 14 (2013) 685-690.

- 317 [8] N.P. Hyland, E.M. Quigley, E. Brint, Microbiota-host interactions in irritable bowel syndrome:  
318 epithelial barrier, immune regulation and brain-gut interactions, *World J Gastroenterol*, 20 (2014)  
319 8859-8866.
- 320 [9] L.M. Kato, S. Kawamoto, M. Maruya, S. Fagarasan, The role of the adaptive immune system  
321 in regulation of gut microbiota, *Immunol Rev*, 260 (2014) 67-75.
- 322 [10] N. Fei, L. Zhao, An opportunistic pathogen isolated from the gut of an obese human causes  
323 obesity in germfree mice, *ISME J*, 7 (2013) 880-884.
- 324 [11] A.V. Hartstra, K.E. Bouter, F. Backhed, M. Nieuwdorp, Insights into the role of the  
325 microbiome in obesity and type 2 diabetes, *Diabetes Care*, 38 (2015) 159-165.
- 326 [12] J. Qin, Y. Li, Z. Cai, S. Li, J. Zhu, F. Zhang, S. Liang, W. Zhang, Y. Guan, D. Shen, Y. Peng,  
327 D. Zhang, Z. Jie, W. Wu, Y. Qin, W. Xue, J. Li, L. Han, D. Lu, P. Wu, Y. Dai, X. Sun, Z. Li, A.  
328 Tang, S. Zhong, X. Li, W. Chen, R. Xu, M. Wang, Q. Feng, M. Gong, J. Yu, Y. Zhang, M. Zhang,  
329 T. Hansen, G. Sanchez, J. Raes, G. Falony, S. Okuda, M. Almeida, E. LeChatelier, P. Renault, N.  
330 Pons, J.M. Batto, Z. Zhang, H. Chen, R. Yang, W. Zheng, S. Li, H. Yang, J. Wang, S.D. Ehrlich,  
331 R. Nielsen, O. Pedersen, K. Kristiansen, J. Wang, A metagenome-wide association study of gut  
332 microbiota in type 2 diabetes, *Nature*, 490 (2012) 55-60.
- 333 [13] N. Tai, F.S. Wong, L. Wen, The role of gut microbiota in the development of type 1, type 2  
334 diabetes mellitus and obesity, *Rev Endocr Metab Disord*, 16 (2015) 55-65.
- 335 [14] G. Cammarota, G. Ianiro, R. Cianci, S. Bibbo, A. Gasbarrini, D. Curro, The involvement of  
336 gut microbiota in inflammatory bowel disease pathogenesis: potential for therapy, *Pharmacol*  
337 *Ther*, 149 (2015) 191-212.
- 338 [15] E. Li, C.M. Hamm, A.S. Gulati, R.B. Sartor, H. Chen, X. Wu, T. Zhang, F.J. Rohlf, W. Zhu,  
339 C. Gu, C.E. Robertson, N.R. Pace, E.C. Boedeker, N. Harpaz, J. Yuan, G.M. Weinstock, E.  
340 Sodergren, D.N. Frank, Inflammatory bowel diseases phenotype, *C. difficile* and NOD2 genotype

341 are associated with shifts in human ileum associated microbial composition, PLoS One, 7 (2012)  
342 e26284.

343 [16] Q. Feng, S. Liang, H. Jia, A. Stadlmayr, L. Tang, Z. Lan, D. Zhang, H. Xia, X. Xu, Z. Jie, L.  
344 Su, X. Li, X. Li, J. Li, L. Xiao, U. Huber-Schonauer, D. Niederseer, X. Xu, J.Y. Al-Aama, H.  
345 Yang, J. Wang, K. Kristiansen, M. Arumugam, H. Tilg, C. Datz, J. Wang, Gut microbiome  
346 development along the colorectal adenoma-carcinoma sequence, Nat Commun, 6 (2015) 6528.

347 [17] S. Jahani-Sherafat, M. Alebouyeh, S. Moghim, H. Ahmadi Amoli, H. Ghasemian-Safaei,  
348 Role of gut microbiota in the pathogenesis of colorectal cancer; a review article, Gastroenterol  
349 Hepatol Bed Bench, 11 (2018) 101-109.

350 [18] Q. Zhu, R. Gao, W. Wu, H. Qin, The role of gut microbiota in the pathogenesis of colorectal  
351 cancer, Tumour Biol, 34 (2013) 1285-1300.

352 [19] C.J. Meehan, R.G. Beiko, A phylogenomic view of ecological specialization in the  
353 *Lachnospiraceae*, a family of digestive tract-associated bacteria, Genome Biol Evol, 6 (2014) 703-  
354 713.

355 [20] M.T. Sorbara, E.R. Littmann, E. Fontana, T.U. Moody, C.E. Kohout, M. Gjonbalaj, V. Eaton,  
356 R. Seok, I.M. Leiner, E.G. Pamer, Functional and Genomic Variation between Human-Derived  
357 Isolates of *Lachnospiraceae* Reveals Inter- and Intra-Species Diversity, Cell Host Microbe, 28  
358 (2020) 134-146 e134.

359 [21] P. Van den Abbeele, C. Belzer, M. Goossens, M. Kleerebezem, W.M. De Vos, O. Thas, R.  
360 De Weirdt, F.M. Kerckhof, T. Van de Wiele, Butyrate-producing *Clostridium* cluster XIVa  
361 species specifically colonize mucins in an in vitro gut model, ISME J, 7 (2013) 949-961.

362 [22] K.P. Scott, J.C. Martin, S.H. Duncan, H.J. Flint, Prebiotic stimulation of human colonic  
363 butyrate-producing bacteria and bifidobacteria, in vitro, FEMS Microbiol Ecol, 87 (2014) 30-40.

- 364 [23] J. Zhang, L. Song, Y. Wang, C. Liu, L. Zhang, S. Zhu, S. Liu, L. Duan, Beneficial effect of  
365 butyrate-producing *Lachnospiraceae* on stress-induced visceral hypersensitivity in rats, *J*  
366 *Gastroenterol Hepatol*, 34 (2019) 1368-1376.
- 367 [24] J. Schulthess, S. Pandey, M. Capitani, K.C. Rue-Albrecht, I. Arnold, F. Franchini, A.  
368 Chomka, N.E. Ilott, D.G.W. Johnston, E. Pires, J. McCullagh, S.N. Sansom, C.V. Arancibia-  
369 Carcamo, H.H. Uhlig, F. Powrie, The Short Chain Fatty Acid Butyrate Imprints an Antimicrobial  
370 Program in Macrophages, *Immunity*, 50 (2019) 432-445 e437.
- 371 [25] H.M. Hamer, D. Jonkers, K. Venema, S. Vanhoutvin, F.J. Troost, R.J. Brummer, Review  
372 article: the role of butyrate on colonic function, *Aliment Pharmacol Ther*, 27 (2008) 104-119.
- 373 [26] Y. Zou, W. Xue, G. Luo, Z. Deng, P. Qin, R. Guo, H. Sun, Y. Xia, S. Liang, Y. Dai, D. Wan,  
374 R. Jiang, L. Su, Q. Feng, Z. Jie, T. Guo, Z. Xia, C. Liu, J. Yu, Y. Lin, S. Tang, G. Huo, X. Xu, Y.  
375 Hou, X. Liu, J. Wang, H. Yang, K. Kristiansen, J. Li, H. Jia, L. Xiao, 1,520 reference genomes  
376 from cultivated human gut bacteria enable functional microbiome analyses, *Nat Biotechnol*, 37  
377 (2019) 179-185.
- 378 [27] Y. Zou, F. Liu, C. Fang, D. Wan, R. Yang, Q. Su, R. Yang, J. Zhao, *Lactobacillus*  
379 *shenzhenensis* sp. nov., isolated from a fermented dairy beverage, *Int J Syst Evol Microbiol*, 63  
380 (2013) 1817-1823.
- 381 [28] M. Drancourt, C. Bollet, A. Carlioz, R. Martelin, J.P. Gayral, D. Raoult, 16S ribosomal DNA  
382 sequence analysis of a large collection of environmental and clinical unidentifiable bacterial  
383 isolates, *J Clin Microbiol*, 38 (2000) 3623-3630.
- 384 [29] S.H. Yoon, S.M. Ha, S. Kwon, J. Lim, Y. Kim, H. Seo, J. Chun, Introducing EzBioCloud: a  
385 taxonomically united database of 16S rRNA gene sequences and whole-genome assemblies, *Int J*  
386 *Syst Evol Microbiol*, 67 (2017) 1613-1617.
- 387 [30] S. Kumar, G. Stecher, K. Tamura, MEGA7: Molecular Evolutionary Genetics Analysis  
388 Version 7.0 for Bigger Datasets, *Mol Biol Evol*, 33 (2016) 1870-1874.



- 389 [31] N. Saitou, M. Nei, The neighbor-joining method: a new method for reconstructing  
390 phylogenetic trees, *Mol Biol Evol*, 4 (1987) 406-425.
- 391 [32] J.D. Thompson, D.G. Higgins, T.J. Gibson, CLUSTAL W: improving the sensitivity of  
392 progressive multiple sequence alignment through sequence weighting, position-specific gap  
393 penalties and weight matrix choice, *Nucleic Acids Res*, 22 (1994) 4673-4680.
- 394 [33] R. Luo, B. Liu, Y. Xie, Z. Li, W. Huang, J. Yuan, G. He, Y. Chen, Q. Pan, Y. Liu, J. Tang, G.  
395 Wu, H. Zhang, Y. Shi, Y. Liu, C. Yu, B. Wang, Y. Lu, C. Han, D.W. Cheung, S.M. Yiu, S. Peng,  
396 Z. Xiaoqian, G. Liu, X. Liao, Y. Li, H. Yang, J. Wang, T.W. Lam, J. Wang, SOAPdenovo2: an  
397 empirically improved memory-efficient short-read de novo assembler, *Gigascience*, 1 (2012) 18.
- 398 [34] R.K. Aziz, D. Bartels, A.A. Best, M. DeJongh, T. Disz, R.A. Edwards, K. Formsma, S.  
399 Gerdes, E.M. Glass, M. Kubal, F. Meyer, G.J. Olsen, R. Olson, A.L. Osterman, R.A. Overbeek,  
400 L.K. McNeil, D. Paarmann, T. Paczian, B. Parrello, G.D. Pusch, C. Reich, R. Stevens, O.  
401 Vassieva, V. Vonstein, A. Wilke, O. Zagnitko, The RAST Server: rapid annotations using  
402 subsystems technology, *BMC Genomics*, 9 (2008) 75.
- 403 [35] S.H. Duncan, R.I. Aminov, K.P. Scott, P. Louis, T.B. Stanton, H.J. Flint, Proposal of  
404 *Roseburia faecis* sp. nov., *Roseburia hominis* sp. nov. and *Roseburia inulinivorans* sp. nov., based  
405 on isolates from human faeces, *Int J Syst Evol Microbiol*, 56 (2006) 2437-2441.
- 406 [36] I.M. Robinson, & Ritchie, A. E. , Emendation of *Acetivibrio* and Description of *Acetivibrio*  
407 *ethanolgignens*, a New Species from the Colons of Pigs with Dysentery, *Int J Syst Bacteriol*, 31  
408 (1981) 333-338.
- 409 [37] B.J. Tindall, R. Rossello-Mora, H.J. Busse, W. Ludwig, P. Kampfer, Notes on the  
410 characterization of prokaryote strains for taxonomic purposes, *Int J Syst Evol Microbiol*, 60  
411 (2010) 249-266.

412 [38] P. Yarza, M. Richter, J. Peplies, J. Euzéby, R. Amann, K.H. Schleifer, W. Ludwig, F.O.  
413 Glockner, R. Rossello-Mora, The All-Species Living Tree project: a 16S rRNA-based  
414 phylogenetic tree of all sequenced type strains, *Syst Appl Microbiol*, 31 (2008) 241-250.

415

416

417

## 418 **Figure legends**

419 **Fig. 1.** Neighbour-joining phylogenetic tree based on 16S rRNA gene sequence of strain TF01-11<sup>T</sup>  
420 and related type species of the family *Lachnospiraceae* and *Ruminococcaceae*. Bootstrap values (>  
421 90 %) based on 1000 replications are shown at branch nodes. *Clostridium butyricum* is used as an  
422 out-group. Bar, 20 % nucleotide sequence divergence.

423

424

425

426

427

428

429

430

431

432

433

434

435

436

437 **Table 1.** Differential phenotypic features among TF01-11<sup>T</sup> and the type species of  
 438 phylogenetically closely related members of family *Lachnospiraceae*.

439 Strains: 1, TF01-11<sup>T</sup>; 2, *R. intestinalis* DSM 14610<sup>T</sup>; 3, *A. ethanolgignens* ATCC 33324<sup>T</sup>; 4, *L.*  
 440 *multipara* DSM 3073<sup>T</sup>. Data were from Duncan *et al.* (2006), Robinson & Ritchie (1981), Bryant  
 441 (1986) and this study. +, Positive; w, weakly positive reaction; –, negative; ND, no data available;  
 442 SCFA, short-chain fatty acid.

| Characteristic         | 1               | 2            | 3               | 4               |
|------------------------|-----------------|--------------|-----------------|-----------------|
| Isolation source       | Human faeces    | Human faeces | Pigs colons     | Cattle rumen    |
| Cell size (µm)         | 0.5–1.0×2.0–8.0 | 0.5×1.5–3    | 0.5–0.9×1.5–2.5 | 0.4–0.6×2.0–4.0 |
| Gram-stain             | Positive        | Variable     | Negetive        | Weakly positive |
| Motility/flagella      | –               | +/Multiple   | +/Fascicle      | +/Monotrichous  |
| Major SCFA(s) produced | a, b, l         | b, f, l      | a, l            | a, f, l         |
| Growth:                |                 |              |                 |                 |
| Temperature range (°C) | 30–42           | 25–42        | 30–42           | 25–50           |
| pH range               | 6.0–8.5         | 6.0–8.0      | 7.0–9.0         | 6.0–9.0         |
| Salt tolerance (%)     | 2               | 2            | 1               | 2               |
| Aesculin hydrolysis    | –               | +            | –               | +               |
| Gelatin hydrolysis     | +               | –            | +               | –               |
| Acid from:             |                 |              |                 |                 |
| Cellobiose             | +               | +            | –               | +               |
| D-Arabinose            | –               | +            | –               | –               |
| D-Galactose            | +               | ND           | +               | –               |

|                           |   |   |   |   |
|---------------------------|---|---|---|---|
| D-Lactose                 | - | - | + | - |
| D-Maltose                 | + | - | + | - |
| D-Mannitol                | - | - | + | - |
| D-Mannose                 | - | - | + | - |
| Salicin                   | - | - | + | - |
| Starch                    | + | + | w | - |
| Sucrose                   | + | + | - | + |
| Enzyme activity (API ZYM) |   |   |   |   |
| Esterase (C4)             | - | + | - | - |
| Esterase lipase (C8)      | - | w | - | - |
| Leucine arylamidase       | - | - | + | w |
| Acid phosphatase          | w | - | - | + |
| $\beta$ -Galactosidase    | - | + | - | - |
| $\beta$ -Glucuronidase    | - | w | - | - |
| $\alpha$ -Glucosidase     | + | - | - | - |
| $\beta$ -Glucosidase      | - | w | - | - |

443 ‡ a, Acetate; b, butyrate; f, formate; l, lactate;

444

445 **Table 2.** Genome size and DNA G+C content of Strain TF01-11<sup>T</sup> compared with three closely  
 446 related isolates of the family *Lachnospiraceae*. The data of *R. intestinalis* DSM 14610<sup>T</sup>, *A.*  
 447 *ethanolgignens* ATCC 33324<sup>T</sup>, *C. eutactus* ATCC 27759<sup>T</sup> and *L. multipara* DSM 3073<sup>T</sup> were  
 448 from NCBI.

| Strain                                           | Accession number | Genome size ( $\times 10^6$ bp) | G+C content (mol%) |
|--------------------------------------------------|------------------|---------------------------------|--------------------|
| Strain TF01-11 <sup>T</sup>                      | LLKB00000000     | 3.61                            | 36.79              |
| <i>R. intestinalis</i> DSM 14610 <sup>T</sup>    | ABYJ00000000     | 4.38                            | 42.6               |
| <i>A. ethanolgignens</i> ATCC 33324 <sup>T</sup> | LNAM00000000     | 3.66                            | 41.0               |
| <i>C. eutactus</i> ATCC 27759 <sup>T</sup>       | ABEY00000000     | 3.10                            | 43.1               |
| <i>L. multipara</i> DSM 3073 <sup>T</sup>        | AUJG00000000     | 2.87                            | 35.3               |

449

450 **Table 3.** Levels of 16S rRNA gene sequence similarity and ANI values (in percentages) based on  
 451 BLAST for strains TF01-11T and the most closely related members of the family  
 452 *Lachnospiraceae*.

453 Strains: TF01-11<sup>T</sup>; 2, *R. intestinalis* DSM 14610<sup>T</sup>; 3, *A. ethanolgignens* ATCC 33324<sup>T</sup>; 4, *C.*  
 454 *eutactus* ATCC 27759<sup>T</sup>; 5, *L. multipara* DSM 3073<sup>T</sup>.

| Strain                                           | Accession no. | 1     | 2     | 3     | 4     | 5   |
|--------------------------------------------------|---------------|-------|-------|-------|-------|-----|
| <b>16S rRNA gene sequence similarity (%)</b>     |               |       |       |       |       |     |
| TF01-11 <sup>T</sup>                             | KT388745      | 100   |       |       |       |     |
| <i>R. intestinalis</i> DSM 14610 <sup>T</sup>    | AJ312385      | 92.18 | 100   |       |       |     |
| <i>A. ethanolgignens</i> ATCC 33324 <sup>T</sup> | FR749897      | 91.99 | 93.22 | 100   |       |     |
| <i>C. eutactus</i> ATCC 27759 <sup>T</sup>       | NR044049      | 89.84 | 91.54 | 91.08 | 100   |     |
| <i>L. multipara</i> DSM 3073 <sup>T</sup>        | FR733699      | 90.60 | 92.34 | 91.48 | 92.43 | 100 |
| <b>ANI values (%)</b>                            |               |       |       |       |       |     |
| TF01-11 <sup>T</sup>                             | LLKB00000000  | 100   |       |       |       |     |
| <i>R. intestinalis</i> DSM 14610 <sup>T</sup>    | ABYJ00000000  | 70.5  | 100   |       |       |     |
| <i>A. ethanolgignens</i> ATCC 33324 <sup>T</sup> | LNAM00000000  | 68.1  | 68.3  | 100   |       |     |
| <i>C. eutactus</i> ATCC 27759 <sup>T</sup>       | ABEY00000000  | 69.3  | 69.5  | 68.9  | 100   |     |
| <i>L. multipara</i> DSM 3073 <sup>T</sup>        | AUJG00000000  | 66.9  | 66.3  | 66.2  | 66.7  | 100 |

455

456 **Table 4.** Number of genes identified in biosynthetic pathway from whole genome sequences of  
 457 strain TF01-11<sup>T</sup> and related organisms identified by RAST.

458 Taxa: 1, TF01-11<sup>T</sup>; 2, *R. intestinalis* DSM 14610<sup>T</sup>; 3, *A. ethanolgignens* ATCC 33324<sup>T</sup>; 4, *C.*  
 459 *eutactus* ATCC 27759<sup>T</sup>; 5, *L. multipara* DSM 3073<sup>T</sup>; 6, *Anaerostipes caccae* DSM 14662<sup>T</sup>. Data  
 460 are for type strains. Numbers of genes identified for benzoquinones (ubiquinones, rodoquinones,  
 461 plastoquinones), naphthoquinones (menaquinones, demethylmenaquinones,  
 462 monomethylmenaquinones, menathioquinones), lipopolysaccharides and mycolic acids were zero  
 463 for all taxa studied.

| <b>Genes responsible for biosynthesis</b> | <b>1</b> | <b>2</b> | <b>3</b> | <b>4</b> | <b>5</b> | <b>6</b> |
|-------------------------------------------|----------|----------|----------|----------|----------|----------|
| Diaminopimelic acid                       | 11       | 12       | 10       | 13       | 12       | 13       |
| Polar lipids                              | 20       | 26       | 19       | 18       | 18       | 39       |
| Polyamines                                | 7        | 17       | 12       | 7        | 13       | 9        |
| Teichoic and lipoteichoic acids           | 12       | 13       | 8        | 2        | 3        | 10       |

464
